# Supplementary material
Source: HighWire-hosted journal article supplement (https://svn.smart01.highwire.org/content/svn-2024-003259)
Supplement: inline-supplementary-material-1 [file inline-supplementary-material-1.pdf]

## Supplemental Material

Table S1. Assessment and follow-up schedule

| Time point                               | Enrollment and Treatment |                      |                       | Follow-up |          |          |           |
|------------------------------------------|--------------------------|----------------------|-----------------------|-----------|----------|----------|-----------|
|                                          | Pre-procedural screening | During the procedure | 3 days or discharge   | 30 days   | 6 months | 1 year   | 3 years   |
| Window phase                             | -14 to 0 day             | 0 day                | whichever comes first | ±3 days   | ±14 days | ±1 month | ±3 months |
| Informed consent                         | X                        |                      |                       |           |          |          |           |
| Inclusion/exclusion criteria             | X                        | X                    |                       |           |          |          |           |
| Past history/demographic data            | X                        |                      |                       |           |          |          |           |
| Vital signs                              | X                        |                      | X                     |           |          |          |           |
| Blood routine                            | X                        |                      | X                     |           |          |          |           |
| Blood biochemistry                       | X                        |                      | X                     |           |          |          |           |
| Coagulation function                     | X                        |                      | X                     |           |          |          |           |
| Clopidogrel resistance test <sup>*</sup> | X                        |                      |                       |           |          |          |           |
| ECG                                      | X                        |                      |                       |           |          |          |           |
| Chest X-ray                              | X                        |                      |                       |           |          |          |           |
| CT+CTA or MRI+MRA <sup>†</sup>           | X                        |                      |                       |           |          |          |           |
| DSA                                      |                          | X                    |                       |           | X        |          | X         |
| NIHSS score                              | X                        |                      | X                     |           |          |          |           |
| mRS score                                | X                        |                      | X                     | X         | X        | X        | X         |
| Use of endovascular devices              |                          | X                    |                       |           |          |          |           |
| Concomitant medication                   | X                        | X                    | X                     | X         | X        | X        | X         |
| AE/SAE                                   |                          | X                    | X                     | X         | X        | X        | X         |
| Defects of study devices                 |                          | X                    |                       |           |          |          |           |

<sup>\*</sup>It is recommended to perform thromboelastography and/or CYP2C19 genotype test to detect the presence of clopidogrel resistance, and clopidogrel is shifted to ticagrelor in patients with clopidogrel resistance.

<sup>†</sup>It is recommended to perform CTP or PWI examination to confirm the presence of hypoperfusion in the territory distal to the target lesion.

Abbreviations: AE, adverse event; CTA, CT angiography; CTP, CT perfusion; DSA, digital subtraction angiography; ECG, electrocardiogram; MRA, MR angiography; mRS, modified Rankin Scale; NIHSS, National Institutes of Health Stroke Scale; PWI, perfusion weighted imaging; SAE, serious adverse event
